1 **TITLE**

2 Cytoplasmic-nuclear incompatibility between wild-isolates of *Caenorhabditis nouraguensis*

3 **AUTHORS**

4 Piero Lamelza<sup>\*,†</sup> and Michael Ailion<sup>\*,†</sup>

5 **AFFILIATIONS**

6 <sup>\*</sup>Molecular and Cellular Biology Program, University of Washington, Seattle WA 98195

7 <sup>†</sup>Department of Biochemistry, University of Washington, Seattle WA 98195

8

9 **Running title:** Speciation genetics in *C. nouraguensis*

10 **Keywords:** Dobzhansky-Muller incompatibility, speciation, cytoplasmic, mitochondria, *Caenorhabditis*

11 **Corresponding author:**

12 Michael Ailion

13 Department of Biochemistry

14 University of Washington

15 Box 357350

16 1705 NE Pacific St

17 Seattle, WA 98195

18 Phone: 206-685-0111

19 email: [mailion@uw.edu](mailto:mailion@uw.edu)

20

## ABSTRACT

How species arise is a fundamental question in biology. Species can be defined as populations of interbreeding individuals that are reproductively isolated from other such populations. Therefore, understanding how reproductive barriers evolve between populations is essential for understanding the process of speciation. Hybrid incompatibility (e.g. hybrid sterility and lethality) is a common and strong reproductive barrier in nature, but few studies have molecularly identified its genetic basis. Here we report a lethal incompatibility between two wild-isolates of the nematode *Caenorhabditis nouraguensis*. Hybrid inviability results from the incompatibility between a maternally inherited cytoplasmic factor from each strain and a recessive nuclear locus from the other. We have excluded the possibility that maternally inherited endosymbiotic bacteria cause the incompatibility by treating both strains with tetracycline and show that hybrid death is unaffected. Furthermore, cytoplasmic-nuclear incompatibility commonly occurs between other wild-isolates, indicating that this is a significant reproductive barrier within *C. nouraguensis*. We hypothesize that the maternally inherited cytoplasmic factor is the mitochondrial genome and that mitochondrial dysfunction underlies hybrid death. This system has the potential to shed light on the dynamics of divergent mitochondrial-nuclear coevolution and its role in promoting speciation.

## INTRODUCTION

How species arise is a fundamental and still unanswered question in biology. Under the biological species concept, species consist of populations of interbreeding individuals that are reproductively isolated from other such populations (Mayr 1942). Thus, to understand speciation, we must learn how reproductive barriers evolve between populations. Post-zygotic reproductive barriers are commonly found in nature, and occur when hybrid progeny are relatively unfit in comparison to their parents and serve as inefficient bridges for gene flow between populations. Hybrids can be extrinsically unfit, in that they are maladapted to their environment (e.g. hybrids exhibit an intermediate phenotype which is unfit in parental environments) or intrinsically unfit, in that they are developmentally abnormal (e.g. hybrids are sterile or inviable) (Coyne and Orr 2004).

The Bateson-Dobzhansky-Muller (BDM) model hypothesizes that hybrids are intrinsically unfit due to incompatible gene combinations. In its simplest form, the model predicts that at least two genetic loci, each having evolved independently in one of two divergent lineages, have deleterious epistatic interactions in hybrids. This model has gained support by the molecular identification of genes required for hybrid dysfunction in several genera (Presgraves 2010). Identifying these genes and the natural forces that drive their evolution is one of the major objectives of speciation genetics. Darwin suggested that differential ecological adaptation by natural selection was the major driving force for speciation. Some of the molecularly identified “incompatibility genes” do indeed show signs of selection (Ting 1998; Presgraves *et al.* 2003; Barbash *et al.* 2004; Brideau *et al.* 2006; Oliver *et al.* 2009; Chae *et al.* 2014; Phadnis *et al.* 2015), but do not always have a clear role in promoting ecological adaptation (Tao *et al.* 2001; Ferree and Barbash 2009; Phadnis and Orr 2009; Seidel *et al.* 2011). However, there are currently only a handful of known incompatibility genes from a limited number of genera. Additional studies from a wider range of taxa are needed to gain a better understanding of the evolutionary forces that drive speciation.

Some studies on the genetic basis of hybrid incompatibility have focused on strong post-zygotic reproductive barriers between well-defined species. These studies reveal that many genetic

54 variants contribute to dysfunction of hybrids (Coyne and Orr 1998), but provide little insight into the  
55 dynamics of the accumulation of such variants or their relative roles in initiating speciation. For  
56 example, theoretical work indicates that the number of genetic incompatibilities increases greater  
57 than linearly with the number of genetic differences between two lineages (Orr 1995). Therefore, a  
58 small number of genetic incompatibilities may initially reduce gene flow and promote genetic  
59 divergence between populations, while others evolve after strong reproductive barriers have already  
60 been established. Given this, studies of incomplete post-zygotic barriers between young species or  
61 divergent populations within species are essential to understand the evolutionary forces that may  
62 initiate speciation.

63         Despite the paucity of molecularly identified incompatibility genes, the segregation of  
64 deleterious phenotypes in a number of interspecific hybridizations indicates that incompatibilities  
65 between cytoplasmic and nuclear genomes occur frequently (Ellison and Burton 2008; Ellison *et al.*  
66 2008; Sambatti *et al.* 2008; Arnqvist *et al.* 2010; Ross *et al.* 2011; Aalto *et al.* 2013). Furthermore,  
67 several studies have definitively mapped these incompatibility loci to the mitochondrial genome and  
68 nuclear genes with mitochondrial functions (Lee *et al.* 2008; Chou *et al.* 2010; Luo *et al.* 2013;  
69 Meiklejohn *et al.* 2013; Huang *et al.* 2015). Aerobic eukaryotic organisms rely on mitochondria to  
70 generate energy required for diverse biological processes. The mitochondrial genome encodes a  
71 small fraction of mitochondrial proteins, but nuclear genes are required for proper replication,  
72 transcription, and translation of mtDNA as well as other mitochondrial proteins (Gustafsson *et al.*  
73 2016). Given the interdependence of the nuclear and mitochondrial genomes, they are expected to  
74 coevolve by the accumulation of compatible mutations that maintain mitochondrial function. By  
75 extension, distinct lineages that undergo unique mitochondrial-nuclear coevolution may be  
76 incompatible and result in mitochondrial dysfunction. Several theories have been proposed to explain  
77 what drives the rapid coevolution of these two genomes, including adaptation to different carbon  
78 sources (Lee *et al.* 2008), arms races between the genomes caused by genetic conflict over the  
79 relative fitness of males and females (Fujii *et al.* 2011), and the accumulation of deleterious mtDNA

00 mutations and the evolution of compensatory nuclear variants that rescue mitochondrial function  
01 (Rand *et al.* 2004; Oliveira *et al.* 2008; Osada and Akashi 2012). However, given the scarcity of  
02 molecularly identified cases of mitochondrial-nuclear incompatibilities, additional studies are required  
03 to form more complete theories regarding the forces that drive their evolution.

04 Here we report incompatibility between the cytoplasmic and nuclear genomes of two distinct  
05 wild-isolates of the male-female nematode *Caenorhabditis nouraguensis*. Cytoplasmic-nuclear  
06 incompatibility is not specific to these two strains, but is also observed upon hybridization of other  
07 distinct wild-isolates of *C. nouraguensis*, indicating that this is a naturally widespread reproductive  
08 barrier within the species. The cytoplasmic-nuclear incompatibility we identify between strains of *C.*  
09 *nouraguensis* may provide an excellent opportunity for a detailed study of mitochondrial-nuclear  
10 incompatibility, the forces that drive the coevolution of these genomes, and their possible role in  
11 speciation.

12

## MATERIALS AND METHODS

### ***Strain isolation and maintenance***

All strains of *C. nouraguensis* used in this study were derived from single gravid females isolated in 2009 or 2011 from rotten fruit or flowers found in French Guiana (Kiontke *et al.* 2011), and have not been subjected to further inbreeding. Strains were kindly provided by Marie-Anne Felix (“JU” prefix) and Christian Braendle (“NIC” prefix). Strain stocks were stored at -80°C. Thawed strains were maintained at 25°C on standard NGM plates spread with a thin lawn of OP50 bacteria (Brenner 1974).

### ***Hybridizing JU1825 and NIC59***

To quantify inviability, we crossed one virgin L4 female and male, with 10-15 replicates for each cross. The edge of each plate was coated with a palmitic acid solution (10 mg/mL in 95% ethanol) and allowed to air dry, resulting in a physical barrier that helps prevent worms from leaving the plate’s surface. The plates were placed at 25°C overnight, during which the worms matured to adulthood and began mating. The next day, each female-male couple was placed onto a new plate streaked with OP50 and rimmed with palmitic acid. Each couple was then allowed to mate and lay eggs for 5 hours at 25°C, and then were permanently removed. The embryos laid within those 5 hours were counted immediately. Approximately 17 hours later, we counted the number of embryos that failed to hatch per plate. These unhatched embryos were scored as dead since *C. nouraguensis* embryogenesis is normally completed within 13 hours at 25°C (data not shown). We defined the percentage of embryonic lethality as the number of unhatched embryos divided by the total number of embryos laid. Approximately 20 hours later, we placed the plates at 4°C for an hour and then counted the number of healthy L4 larvae and young adults per plate. We defined the percentage of viable progeny as the total number of L4 larvae and young adults divided by the total number of embryos laid.

## **Determining cytoplasmic-nuclear compatibility between various strains of *C. nouraguensis***

To test for an incompatibility between one strain's cytoplasm and another strain's nuclear genome, we compared the viabilities of backcrosses that differ only in the F1 hybrid female's cytoplasmic genotype (e.g. (NIC59); NIC59/JU1837 F1 female x JU1837 male vs (JU1837); NIC59/JU1837 F1 female x JU1837 male, Figure 3A). The genotype is designated by the following nomenclature: (cytoplasmic genotype); nuclear genotype. The cytoplasmic genotype indicates genetic elements that are only maternally inherited, such as the mitochondrial genome. We performed a Fisher's exact test to determine whether there were significant differences in the proportions of viable and inviable F2 progeny between the two types of crosses. We also calculated the relative viability of the two crosses (e.g. the percent viability of the (NIC59); NIC59/JU1837 F1 female x JU1837 male cross divided by the percent viability of (JU1837); NIC59/JU1837 F1 female x JU1837 male cross). Cytoplasmic-nuclear combinations that show a statistically significant difference in viabilities between the two types of crosses and a relative viability  $<1$  were considered to be cytoplasmic-nuclear incompatibilities. Three biological replicates were performed for each cytoplasmic-nuclear combination except for JU1825 cytoplasmic - NIC24 nuclear and JU1825 cytoplasmic - NIC54 nuclear, which have four replicates each. For each biological replicate, 10 F1 hybrid L4 females were crossed to 10 L4 males on the same plate overnight at 25°C. The next day, they were moved to a new plate and allowed to lay embryos at 25°C for 1 hour. The parents were then removed and the percent viable progeny and embryonic lethality were calculated as described in the previous section of the Materials and Methods. The heat map used to visualize the median relative viability for each cytoplasmic nuclear combination was made using the heatmap.2 function from the gplot package in R.

## **Molecular Methods**

To determine if either JU1825 or NIC59 are infected with *Wolbachia*, we performed PCR on crude lysates of both strains using degenerate primers targeted against two genes that are conserved



55 in *Wolbachia* (Baldo *et al.* 2006). Specifically, we attempted to detect *gatB* (*gatB\_F1* with M13  
56 adapter, TGTAACACGACGGCCAGTGAKTTAAAYCGYGCAGGBGTT, and *gatB\_R1* with M13  
57 adapter, CAGGAAACAGCTATGACCTGGYAAAYTCRGGYAAAGATGA) and *fbpA* (*fbpA\_F3*,  
58 GTTAACCCTGATGCYYAYGAYCC, and *fbpA\_R3*, TCTACTTCCTTYGAYTCDCCRCC). As controls,  
59 we performed PCR on squash preps of *Drosophila melanogaster* w<sup>1118</sup> mutant strains (Bloomington  
60 stock number 3605) that were infected or not infected with *Wolbachia*. *Drosophila melanogaster*  
61 strains were kindly provided by the laboratories of Harmit Malik and Leo Pallanck.

### 62

### 63 **Tetracycline treatment of JU1825 and NIC59**

64 Both JU1825 and NIC59 were passaged on 50 ug/mL tetracycline NGM plates streaked with  
65 OP50 for nine generations. Both strains were treated by placing 10 L4 females and 10 L4 males on a  
66 fresh tetracycline plate and allowing them to mate and produce the next generation of L4 progeny,  
67 which were then moved to a fresh tetracycline plate. Tetracycline plates were made by allowing NGM  
68 plates with OP50 lawns to soak up a mixture of tetracycline and 1x M9. The plates were left  
69 uncovered at room temperature until dry, and then used the following day.

### 70

### 71 **Statistics**

72 P values were determined using R (v 3.2.5). Several statistical tests were used (Kruskal-Wallis test  
73 followed by Dunn's test, and Fisher's exact test). When we performed several comparisons on the  
74 same dataset, we used the Bonferroni method to correct p-values for multiple testing. Most plots were  
75 made using the ggplot2 package in R.

### 76

### 77 **Data Availability**

78 The authors state that all data necessary for confirming the conclusions presented in the article are  
79 represented fully within the article and Supplemental Material.

## RESULTS

### Two strains of *C. nouraguensis* exhibit F2 hybrid breakdown

Two strains of *C. nouraguensis*, JU1825 and NIC59, were derived from single gravid females that were isolated approximately 112 kilometers apart in French Guiana (Kiontke *et al.* 2011). Both of these strains were designated as belonging to *C. nouraguensis* based on having highly similar ITS2 rDNA sequences, which serves as a good species barcode within the *Caenorhabditis* genus, and because they produced many viable F1 offspring when crossed (Kiontke *et al.* 2011; Félix *et al.* 2014). We found that both strains produce high numbers of viable progeny in intra-strain crosses. We have also confirmed the previous finding of F1 hybrid viability by crossing NIC59 females to JU1825 males, and vice versa, showing that the F1 hybrids resulting from these inter-strain crosses exhibit levels of viability comparable to those seen in intra-strain crosses (Figure 1).

However, not all reproductive barriers act in the F1 generation. There are many cases of F2 hybrid breakdown, in which reduction of hybrid fitness begins to manifest itself in the F2 generation due to recessive incompatibility loci (Masly *et al.* 2006; Bikard *et al.* 2009; Stelkens *et al.* 2015). To test for F2 hybrid inviability, we mated hybrid F1 siblings derived from either JU1825 female x NIC59 male crosses, or from NIC59 female x JU1825 male crosses, and assayed the F2 generation for reductions in fitness. These F1 hybrids are referred to as “(J); N/J” and “(N); N/J” respectively, where the genotype is designated by the following nomenclature: (cytoplasmic genotype); nuclear genotype. The cytoplasmic genotype indicates genetic elements that are only maternally inherited, such as the mitochondrial genome. We found that both types of F1 sibling crosses resulted in a significant decrease in the percentage of viable progeny, with on average only 71% and 63% of F2 embryos maturing to the L4 or young adult stage (Figure 1). These results indicate that there are divergent genomic loci between NIC59 and JU1825 that cause inviability only when they become homozygous in F2 hybrids. Additionally, there is no difference in sex-specific mortality in hybrids in comparison to intra-strain crosses which implies that these loci are autosomally linked, as we show later (Figure 1).

## 07 **Incompatibilities between cytoplasmic and nuclear genomes cause F2 inviability**

08 To further understand the genetic architecture of hybrid breakdown between JU1825 and  
09 NIC59, we tested whether maternally or paternally inherited factors are required for F2 inviability. We  
10 reasoned that backcrossing F1 females to parental males would test whether maternal factors are  
11 required for reduced hybrid fitness, while backcrossing F1 males to parental females would test  
12 whether paternal factors are required. For example, backcrossing F1 hybrid females to JU1825 males  
13 will result in an F2 population with a 50% chance of being heterozygous (NIC59/JU1825) and a 50%  
14 chance of being homozygous (JU1825/JU1825) for any given autosomal locus. Therefore, this cross  
15 will test for maternally deposited NIC59 factors that are incompatible with homozygous JU1825  
16 autosomal loci. The same logic can be applied to crosses of F1 hybrid males to parental strain  
17 females.

18 All instances of backcrossing F1 hybrid males to parental strain females resulted in levels of  
19 F2 viability similar to those observed in parental strains. Therefore, paternal factors do not have a  
20 major effect on F2 inviability (Figure 2A). Only two crosses consistently resulted in significantly  
21 reduced viability. The first is when (N); N/J F1 females were crossed to JU1825 males, with on  
22 average only 36% of F2 hybrids maturing to the L4 or young adult stage. This cross implies that there  
23 are maternally derived NIC59 factors distributed to F2 embryos, and these factors are incompatible  
24 with recessive JU1825 nuclear loci. The second is when (J); N/J F1 females are crossed to NIC59  
25 males, with on average only 52% of the F2 hybrids maturing to the L4 or young adult stage (Figure  
26 2B). This cross implies that there are also maternally derived JU1825 factors distributed to F2  
27 embryos, and these factors are incompatible with recessive NIC59 nuclear loci. The viability of (J);  
28 N/J F1 female x JU1825 male crosses can also be significantly reduced in comparison to intra-strain  
29 crosses, but varies within and between experiments (Figure S1).

30 Interestingly, the F1 female backcross experiments show that almost identical crosses, which  
31 differ only in the cytoplasmic genotype of the F1 female, have significantly different rates of F2  
32 viability. For instance, (N); N/J F1 female x JU1825 male crosses consistently have significantly lower

33 F2 viability than (J); N/J F1 female x JU1825 male crosses (Figure 2, Figure S1). Similarly, (J); N/J F1  
34 female x NIC59 male crosses consistently have significantly lower F2 viability than (N); N/J F1 female  
35 x NIC59 male crosses (Figure 2). These F1 hybrid females are expected to be genotypically identical  
36 at all nuclear loci, suggesting that something other than the F1 nuclear genome encodes maternal  
37 factors that lead to F2 inviability. One possible model to explain the differences in these backcrosses  
38 is that the mitochondrial genome is the maternally inherited factor that is incompatible with recessive  
39 nuclear loci in the F2 generation. For example, all F2 progeny from (N); N/J F1 female x JU1825 male  
40 crosses will inherit only NIC59 mtDNA, which may be incompatible with nuclear loci homozygous (or  
41 hemizygous) for JU1825 alleles resulting in inviability (Figure 6A). In comparison, all F2 progeny from  
42 (J); N/J F1 female x JU1825 male crosses will inherit only JU1825 mtDNA, which should be  
43 compatible with the JU1825 nuclear genome and therefore not result in the same inviability. The  
44 same logic can be applied to the (J); N/J F1 female x NIC59 male and (N); N/J F1 female x NIC59  
45 male crosses. Therefore, we hypothesize that F2 inviability is the result of two distinct cytoplasmic-  
46 nuclear incompatibilities, one between the NIC59 mitochondrial genome and recessive JU1825  
47 nuclear loci, and another between the JU1825 mitochondrial genome and recessive NIC59 nuclear  
48 loci.

## 50 **The nuclear incompatibility loci are linked to autosomes**

51 Nematodes commonly have an XX (female) and XO (male) sex determining mechanism  
52 (Pires-daSilva 2007). The F1 hybrid female backcross experiments reveal that there is no difference  
53 in sex-specific mortality in hybrids in comparison to intra-strain crosses (Figure 2B). However, given  
54 the expected genotypes of their F2 populations, these backcrosses on their own do not allow us to  
55 determine whether the nuclear incompatibility loci are autosomally or X-linked. In the previous  
56 section, we concluded that the inviability of the F2 progeny derived from (N); N/J F1 female x JU1825  
57 male crosses is the result of a genetic incompatibility between the NIC59 mitochondrial genome and  
58 nuclear loci homozygous (or hemizygous) for JU1825 alleles. If this is true, it is reasonable to assume

59 that the same genetic incompatibility occurs in (N); N/J F1 female x (N); N/J F1 male crosses (Figure  
60 1). In this F1 sibling cross, if the JU1825 nuclear incompatibility locus were autosomally linked, both  
61 sexes would suffer equal rates of inviability. However, if the nuclear incompatibility locus were linked  
62 to the X-chromosome, then we would expect a significant decrease in the proportion of viable males  
63 in comparison to intra-strain crosses (Figure S2). However, we observe no significant difference in  
64 the proportion of viable males for the (N); N/J F1 female x (N); N/J F1 male cross (Figure 1).  
65 Therefore, given the data from the F1 female backcrosses and the F1 sibling crosses, we conclude  
66 that the JU1825 nuclear incompatibility locus is autosomally linked. A similar line of reasoning  
67 indicates that the NIC59 nuclear incompatibility locus is also autosomally linked.

### 59 **Endosymbiotic bacteria do not cause hybrid inviability**

70 We hypothesize that mitochondrial genomes are responsible for the cytoplasmic component of  
71 the hybrid incompatibility between NIC59 and JU1825. However, we also considered whether  
72 endosymbiotic bacteria of the *Rickettsiales* order could be involved. Within this order, bacteria of the  
73 *Wolbachia* genus are known to infect certain species of nematodes, and are transmitted to host  
74 progeny through female gametes (Werren *et al.* 2008). Furthermore, hybrid lethality in inter-strain and  
75 interspecies crosses is sometimes caused by infection with divergent *Wolbachia* strains (Bourtzis *et*  
76 *al.* 1996; Bordenstein *et al.* 2001). However, we failed to detect conserved genes typically used to  
77 genotype diverse strains of *Wolbachia* in either JU1825 or NIC59 using PCR with degenerate primers  
78 (Figure S3A). Additionally, treatment of both strains with tetracycline for nine generations failed to  
79 rescue hybrid inviability (Figure S3B). Endosymbiotic bacteria within the *Rickettsiales* order are  
80 typically susceptible to tetracycline (McOrist 2000; Darby *et al.* 2015). Thus, endosymbiotic bacteria  
81 are unlikely to cause the reproductive barrier between NIC59 and JU1825.

### 33 **Cytoplasmic-nuclear incompatibility is common within *C. nouraguensis***

34 We hybridized additional wild-isolates to determine whether cytoplasmic-nuclear  
35 incompatibilities represent a common reproductive barrier within *C. nouraguensis*, or whether they  
36 are an unusual phenotype only observed in hybridizations between NIC59 and JU1825. Specifically,  
37 we tested the compatibility of four cytoplasmic genotypes with seven nuclear genotypes (Figure 3).  
38 To test for an incompatibility between one strain's cytoplasm and another strain's nuclear genome,  
39 we again compared the viabilities of backcrosses that differ only in the F1 hybrid female's cytoplasmic  
40 genotype (Figure 3A). Specifically, we compared the viability of the backcross that combines  
41 heterotypic cytoplasmic and nuclear genotypes to the viability of the backcross that combines  
42 homotypic cytoplasmic and nuclear genotypes. We calculated the relative viability of the two crosses  
43 (i.e. heterotypic combination / homotypic combination), and tested for statistically significant  
44 differences (see Materials and Methods). Using the same logic as for our JU1825 x NIC59 crosses,  
45 we reasoned that lower viability of the heterotypic cytoplasmic-nuclear combination in comparison to  
46 the homotypic cytoplasmic-nuclear combination indicates a cytoplasmic-nuclear incompatibility. Three  
47 or four biological replicates were performed for each cytoplasmic-nuclear combination.

48 Of the 74 cytoplasmic-nuclear tests performed, 50 (67%) exhibited significant incompatibilities  
49 (Figure 3B). Additionally, each cytoplasmic genotype was consistently incompatible with at least one  
50 heterotypic nuclear genotype (i.e. all replicates for a particular cytoplasmic-nuclear combination  
51 indicate a significant incompatibility). However, there are a number of cytoplasmic-nuclear  
52 combinations whose replicates are inconsistent with one another (e.g. some replicates indicate a  
53 significant incompatibility while others do not) (Figure 3C and Figure S4). This may indicate that the  
54 genetic loci required for hybrid inviability are not fixed between the strains, but rather are  
55 polymorphisms segregating within each strain. This is consistent with the fact that none of these  
56 strains have been formally inbred. Regardless, given their common occurrence in hybridizations  
57 between strains of *C. nouraguensis*, we hypothesize that cytoplasmic-nuclear incompatibilities are a  
58 significant reproductive barrier within the species.

9 We generated a heat map to help visualize the median relative viability for each cytoplasmic-  
10 nuclear combination (Figure 3C). Strikingly, the NIC59 cytoplasmic genotype exhibits a distinct  
11 response to hybridization, being strongly incompatible (i.e. having a low median relative viability) with  
12 all of the nuclear genotypes tested. By comparison, the other cytoplasmic genotypes can be relatively  
13 compatible with some heterotypic nuclear genotypes or exhibit incompatibilities that are typically  
14 weaker than those involving the NIC59 cytoplasmic genotype. Specifically, incompatibilities involving  
15 the JU1837 or JU1854 cytoplasmic genotypes have significantly higher relative viability (median=0.72  
16 and 0.71, respectively) in comparison to incompatibilities with the NIC59 cytoplasmic genotype  
17 (median=0.45) (Figure 3B). Incompatibilities involving the JU1825 cytoplasm exhibit an intermediate  
18 level of relative viability (median=0.64) that is statistically indistinguishable from the other cytoplasmic  
19 genotypes ( $P=0.057$  in comparison to NIC59;  $P=1.0$  in comparison to both JU1837 and JU1854). We  
20 conclude that the NIC59 cytoplasmic genotype is distinct in terms of the nuclear genotypes it is  
21 incompatible with and how severe those incompatibilities are.

### 23 **A single BDM incompatibility between a NIC59 cytoplasmic locus and a JU1825 nuclear locus** 24 **causes embryonic lethality**

25 As previously discussed, the backcross that combines the NIC59 cytoplasmic genotype with  
26 JU1825 nuclear genotype (i.e. (N); N/J F1 female x JU1825 male, Figure 2B) results in only ~36% of  
27 F2 offspring maturing to the L4 or young adult stage. A more detailed characterization of F2 inviability  
28 shows that ~50% of F2 offspring fail to complete embryogenesis (Figure 4A). Of the remaining half  
29 that complete embryogenesis, ~33% fail to mature to the L4 or young adult stage (data not shown). In  
30 comparison, (J); N/J F1 female x JU1825 male crosses result in low levels of embryonic lethality,  
31 similar to parental crosses. These data are consistent with F2 embryonic lethality resulting from a  
32 single BDM incompatibility between a NIC59 cytoplasmic locus and a single homozygous JU1825  
33 autosomal locus.

34 To test the hypothesis of a single BDM incompatibility, we crossed viable F2 females to  
35 JU1825 males and assayed F3 viability. Under this hypothesis, the surviving F2 females are expected  
36 to have inherited NIC59 mtDNA and be heterozygous (i.e. JU1825/NIC59) at the JU1825 nuclear  
37 incompatibility locus (Figure 6A). Therefore, crossing these F2 females to JU1825 males should also  
38 result in ~50% embryonic lethality in the F3 generation. This pattern should also be true for additional  
39 backcross generations (e.g. F4, F5 etc.). Thus, we generated 15 independent backcross lineages,  
40 each consisting of matings between single surviving hybrid females and JU1825 males, and  
41 monitored each lineage's viability for four backcross generations. Indeed, the approximately 50%  
42 embryonic lethality observed in the F2 generation is also observed in the subsequent backcross  
43 generations in all lineages (Figure 4B). These results are consistent with the hypothesis that  
44 embryonic lethality is the result of a simple two-locus BDM incompatibility between a purely  
45 maternally inherited cytoplasmic NIC59 locus and a single nuclear locus homozygous for JU1825  
46 alleles. We hypothesize that the post-embryonic inviability may be a genetically separable phenotype.

### 48 **The JU1825 cytoplasm appears to be heteroplasmic**

49 As previously discussed, the backcross that combines the JU1825 cytoplasmic genotype with  
50 the NIC59 nuclear genotype (i.e. (J); N/J F1 female x NIC59 male crosses) results in ~50% F2  
51 viability on average (Figure 2B). Thus, the total F2 inviability could be the result of a single BDM  
52 incompatibility between a JU1825 cytoplasmic locus and a single autosomal locus homozygous for  
53 NIC59 alleles.

54 To test this hypothesis, we generated 15 independent backcross lineages, each consisting of  
55 matings between single surviving hybrid females and NIC59 males, and monitored each lineage's  
56 viability for four backcross generations. To our surprise, while some lineages continued to exhibit low  
57 levels of viability similar to the F2 generation average (~50%), others began to exhibit and maintain  
58 significantly increased viability for multiple backcross generations (Figure 5A). For example, in this  
59 particular experiment we found that in the F2 generation a majority of lineages (13/15) had a total



50 viability ranging from 18-50%, while only two exhibited higher viability (68% and 85%). However, by  
51 the F5 backcross generation, we found that of the fourteen remaining lineages only four exhibited  
52 50% viability or less. Strikingly, by the F5 generation, 5/14 backcross lineages exhibited nearly 100%  
53 viability.

54 The rescue of hybrid inviability for some lineages via several generations of backcrossing is  
55 peculiar. One hypothesis to explain this phenomenon is that the JU1825 cytoplasmic and/or NIC59  
56 nuclear incompatibility loci are not fixed within their respective strains, but rather are segregating  
57 polymorphisms. As a specific example, the JU1825 cytoplasmic incompatibility locus could be  
58 heteroplasmic for alleles that are either incompatible or compatible with the NIC59 nuclear genome.  
59 The mitochondrial genome is present at a high copy number within a single cell, and it is thought that  
60 individual mtDNAs are randomly replicated and segregated to daughter cells during cell division.  
61 Studies on the inheritance of various mtDNA heteroplasmies show that their frequency amongst  
62 siblings from the same mother can be highly variable due to the random sampling of mtDNAs and  
63 genetic bottlenecks during female germline development (Wallace and Chalkia 2013). Therefore, it is  
64 possible that a NIC59-compatible cytoplasmic allele has increased in frequency in some backcross  
65 lineages and rescued inviability.

66 To gain a better understanding of the genetic composition of the JU1825 cytoplasm, we also  
67 monitored the viability of (J); N/J female x JU1825 male lineages over four backcross generations.  
68 Because this cross combines homotypic JU1825 cytoplasmic and JU1825 nuclear genotypes, we  
69 originally predicted that the relatively high rates of F2 viability would persist or possibly increase with  
70 additional backcross generations. However, we instead observed that some backcross lineages  
71 showed a striking decrease in viability after the F2 generation (Figure 5B). For example, in this  
72 particular experiment, lineages in the F2 generation exhibited a uniform distribution of viability, with  
73 an average of 74%. By the F5 generation we find two distinct populations of lineages, those with a  
74 high viability ranging from 85-96% (6/14 lineages) and those with an astonishingly low viability  
75 ranging from 29-55% (8/14 lineages) (Figure 5B). The latter population has an average viability of

36 39%, which is quite similar to that observed in (N); N/J F1 female x JU1825 male crosses (~36%,  
37 Figure 2B), indicating that although these lineages inherited their cytoplasm from JU1825 mothers,  
38 they now seem to exhibit low levels of viability similar to those observed in the NIC59 cytoplasmic –  
39 JU1825 nuclear incompatibility. One hypothesis to explain these data is that the JU1825 cytoplasm  
40 harbors a NIC59-like allele which at a certain threshold frequency can mimic the NIC59 cytoplasmic-  
41 JU1825 nuclear incompatibility in certain (J); N/J F1 female x JU1825 male backcross lineages.

42 In support of this hypothesis, the rate of embryonic lethality for some (J); N/J female x JU1825  
43 male backcross lineages also increases to levels observed in the NIC59 cytoplasmic – JU1825  
44 nuclear incompatibility (i.e. 50%) and can be stably inherited for several backcross generations  
45 (Figure 5C). Specifically, most lineages (12/14) in the F2 generation exhibited only 0-19% embryonic  
46 lethality, while only two lineages exhibited higher rates (38 and 47%). However, by the F5 backcross  
47 generation, only about half of the lineages (6/14) exhibited 0-8% embryonic lethality, while 8/14  
48 lineages exhibited 35-65% embryonic lethality. Taken together, the results from the two backcross  
49 experiments are consistent with the hypothesis that the JU1825 cytoplasm is heteroplasmic and  
50 harbors both JU1825-like and NIC59-like incompatibility loci (Figure 6B and C).

## DISCUSSION

We discovered a lethal cytoplasmic-nuclear incompatibility between two wild isolates of *C. nouraguensis*, JU1825 and NIC59, and find that such incompatibilities may be widespread between other wild-isolates within the species. We show that maternally inherited endosymbiotic bacteria are not the cause of hybrid inviability, making the mitochondrial genome the most likely candidate for harboring the cytoplasmic incompatibility factor(s). We also propose that the JU1825 cytoplasm is heteroplasmic, and harbors both JU1825-like and NIC59-like incompatibility loci.

In eukaryotes, the mitochondrial genome typically contains a very small fraction of the gene content of a cell, yet it seems to be involved in a disproportionate number of genetic incompatibilities across a diverse range of taxa (Rand *et al.* 2004; Burton and Barreto 2012). However, there are relatively few cases in which incompatibility loci have been definitively mapped to the mitochondrial genome, and therefore a larger sample is required to better understand what drives the evolution of mitochondrial-nuclear incompatibility. Additionally, all of the molecularly identified cases of mitochondrial-nuclear incompatibility have been found between species rather than within species (Lee *et al.* 2008; Chou *et al.* 2010; Luo *et al.* 2013; Meiklejohn *et al.* 2013; Ma *et al.* 2016). Some of these inter-species hybridizations harbor additional genetic incompatibilities or chromosomal rearrangements that cause inviability and sterility (Hunter *et al.* 1996; Fischer *et al.* 2000; Brideau *et al.* 2006; Ferree and Barbash 2009; Mihola *et al.* 2009; Davies *et al.* 2016), making it difficult to discern whether mitochondrial-nuclear incompatibility was instrumental in initiating speciation or evolved after strong reproductive isolation occurred. The incompatibility we describe here provides an excellent opportunity to study the evolutionary genetics and cell biology of incipient speciation as well as mitochondrial-nuclear incompatibility. The ease of breeding, large brood sizes, and short generation time of *C. nouraguensis* should facilitate the mapping and identification of the genes that contribute to hybrid inviability.

### **Asymmetric cytoplasmic-nuclear incompatibilities**

28 Most molecularly characterized BDM incompatibilities are asymmetric, in that only one of two  
29 divergent alleles at a locus is incompatible with heterospecific alleles at other loci (e.g. Brideau *et al.*  
30 2006; Ferree and Barbash 2009). This is also true of the mitochondrial-nuclear incompatibilities seen  
31 in *Saccharomyces* species hybridizations (Lee *et al.* 2008; Chou *et al.* 2010). For example, an intron  
32 of the *COX-1* gene in the *Saccharomyces bayanus* mitochondrial genome fails to be correctly spliced  
33 by the nuclear encoded *S. cerevisiae* *MRS-1* gene, resulting in hybrid inviability presumably due to  
34 a failure of respiration on non-fermentable media. However, a similar incompatibility does not occur  
35 between *S. cerevisiae* *COX-1* and *S. bayanus* *MRS-1*. At first glance it may seem as though the  
36 cytoplasmic-nuclear incompatibility between JU1825 and NIC59 is symmetric, since both strains have  
37 a cytoplasm that is incompatible with the other strain's nuclear genome. However we currently cannot  
38 determine whether the JU1825 or NIC59 cytoplasmic and nuclear incompatibility loci are allelic,  
39 leaving open the possibility that different genes cause hybrid inviability in the reciprocal crosses.

#### 41 **Cytoplasmic-nuclear incompatibility: both sexes are equally inviable**

42 J.B.S Haldane noted that the heterogametic sex more often suffers from inviability or sterility in  
43 inter-species hybridizations than the homogametic sex (Delph and Demuth 2016). It is not known  
44 whether "Haldane's rule" also applies in intra-species hybridizations. The lethal cytoplasmic-nuclear  
45 incompatibility we identified between the NIC59 and JU1825 wild isolates of *C. nouraguensis* affects  
46 females and males equally, suggesting that the two sexes share the same disrupted developmental  
47 pathway(s). However, we have not carefully studied other aspects of sex-specific fitness, such as  
48 female and male F2 hybrid fertility. Because the mitochondrial genome is inherited only through  
49 females, theory predicts that evolution will lead to the accumulation of mtDNA variants that are  
50 neutral or increase female fitness, but that are neutral or possibly deleterious to male fitness  
51 (Gemmell *et al.* 2004). Because of this, male-specific functions may be more adversely affected  
52 during the hybridization of heterotypic mitochondrial and nuclear genomes. This is indeed the case for  
53 some known mitochondrial-nuclear incompatibilities. For example, when swapping the mitochondrial

54 genomes between mouse subspecies via pronuclear transfer, one mitochondrial-nuclear combination  
55 resulted in reduced male fertility while females had relatively normal fertility (Ma *et al.* 2016).  
56 Therefore, further studies of *C. nouraguensis* hybrid male fertility are required to more fully address  
57 whether this system follows Haldane's rule, as well as to determine whether there are male-specific  
58 mitochondrial-nuclear incompatibilities.

## 59 60 **JU1825 heteroplasmy**

61 We hypothesize that the JU1825 cytoplasm is heteroplasmic and contains mitochondrial  
62 genomes that are both compatible (JU1825-like) and incompatible (NIC59-like) with the JU1825  
63 nuclear incompatibility locus. If the JU1825 cytoplasm is naturally heteroplasmic, we predict the  
64 NIC59-like mtDNAs are kept at a low frequency within JU1825 by selection. This selection would be  
65 relaxed in (J); N/J F1 hybrids and the frequency of NIC59-like mtDNA can increase, reducing  
66 incompatibility in backcrosses to NIC59 males and increasing incompatibility in backcrosses to  
67 JU1825 males. However, our data cannot rule out the possibility that NIC59-like mtDNA is introduced  
68 into F1 females by incomplete degradation and inheritance of paternal NIC59 mtDNA. Interestingly,  
69 indirect evidence suggests that paternal mtDNA can be inherited when hybridizing different wild  
70 isolates of *Caenorhabditis briggsae* (Hicks *et al.* 2012; Chang *et al.* 2015).

71 The hypothesized heteroplasmy of the JU1825 cytoplasm may explain the greater variance of  
72 F2 viability in crosses with (J); N/J F1 females in comparison to those with presumably homoplasmic  
73 (N); N/J F1 females. Stochastic segregation and genetic bottlenecking events from JU1825 mothers  
74 may result in F1 females with a wide range of frequencies of the NIC59-like cytoplasmic allele, and  
75 therefore a wide range of F2 viability when backcrossed to either NIC59 or JU1825 males. This  
76 stochastic inheritance may also explain why the degree of F2 viability of (J); N/J F1 female x JU1825  
77 male backcrosses can also vary significantly from experiment to experiment (Figure S1).

## 78 79 **Acknowledgments**

30 We thank Marie-Anne Félix and Christian Braendle for providing the *Caenorhabditis nouraguensis*  
31 strains used in this study. We also thank the labs of Harmit Malik and Leo Pallanck for providing  
32 *Drosophila melanogaster* strains with and without *Wolbachia*. We thank Janet Young, Harmit Malik,  
33 Maitreya Dunham and Irimi Topalidou for helpful discussions and comments on the manuscript. P.L.  
34 was supported in part by an NIH Institutional Training Grant (PHS, NRSA, T32GM007270 from  
35 NIGMS). This work was supported by an NSF CAREER award to M.A.

36

## 37 **Figure Legends**

38 **Figure 1. JU1825 and NIC59 exhibit F2 hybrid breakdown.** Crosses are listed on the y-axis.

39 Letters in parentheses to the left of a semi-colon denote the cytoplasmic genotype of an individual  
40 (e.g. "(J)" individuals have a JU1825 cytoplasmic genotype), while letters to the right of a semi-colon  
41 denote the genotypes of all autosomal loci (i.e. "N/J" individuals are heterozygous NIC59/JU1825  
42 throughout the autosomes). Only (J); N/J F1 x (J); N/J F1 and (N); N/J F1 x (N); N/J F1 crosses  
43 exhibit a significant decrease in the percentage of viable progeny ( $P < 0.01$  and  $P < 0.001$ , respectively).  
44 There are no significant differences in the percentages of viable males between crosses ( $P > 0.05$ ).  
45  $N = 14$  or  $15$  plates per cross. All p-values were calculated by a Kruskal-Wallis test followed by Dunn's  
46 test.

47  
48 **Figure 2. F2 inviability involves a maternal cytoplasmic effect. (A)** There is no significant  
49 difference in the percentage of viable progeny between any of the F1 hybrid male backcrosses and  
50 intra-strain crosses ( $P > 0.05$ ). **(B)** Backcrossing hybrid females to parental strain males reveals that  
51 only (N); N/J F1 female x JU1825 male crosses and (J); N/J F1 female x NIC59 male crosses exhibit  
52 a significant decrease in the percentage of viable progeny in comparison to intra-strain crosses  
53 ( $P < 0.001$ ). (N); N/J F1 female x JU1825 male crosses have significantly decreased viability in  
54 comparison to (J); N/J F1 female x JU1825 male crosses ( $P < 0.001$ ). Additionally, (J); N/J F1 female x  
55 NIC59 male crosses consistently have significantly decreased viability in comparison to (N); N/J F1  
56 female x NIC59 male crosses ( $P < 0.05$ ). The viability of (J); N/J F1 female x JU1825 males can differ  
57 significantly between experiments (Figure S1). There are no significant differences in the proportion  
58 of viable males between the crosses ( $P > 0.05$ ).  $N = 14$  or  $15$  plates per cross. All p-values were  
59 calculated by a Kruskal-Wallis test followed by Dunn's test.

60  
61  
62  
63  
64  
65  
66  
67  
68  
69  
70  
71  
72  
73  
74  
75  
76  
77  
78  
79  
80  
81  
82  
83  
84  
85  
86  
87  
88  
89  
90  
91  
92  
93  
94  
95  
96  
97  
98  
99  
100  
101  
102  
103  
104  
105  
106  
107  
108  
109  
110  
111  
112  
113  
114  
115  
116  
117  
118  
119  
120  
121  
122  
123  
124  
125  
126  
127  
128  
129  
130  
131  
132  
133  
134  
135  
136  
137  
138  
139  
140  
141  
142  
143  
144  
145  
146  
147  
148  
149  
150  
151  
152  
153  
154  
155  
156  
157  
158  
159  
160  
161  
162  
163  
164  
165  
166  
167  
168  
169  
170  
171  
172  
173  
174  
175  
176  
177  
178  
179  
180  
181  
182  
183  
184  
185  
186  
187  
188  
189  
190  
191  
192  
193  
194  
195  
196  
197  
198  
199  
200  
201  
202  
203  
204  
205  
206  
207  
208  
209  
210  
211  
212  
213  
214  
215  
216  
217  
218  
219  
220  
221  
222  
223  
224  
225  
226  
227  
228  
229  
230  
231  
232  
233  
234  
235  
236  
237  
238  
239  
240  
241  
242  
243  
244  
245  
246  
247  
248  
249  
250  
251  
252  
253  
254  
255  
256  
257  
258  
259  
260  
261  
262  
263  
264  
265  
266  
267  
268  
269  
270  
271  
272  
273  
274  
275  
276  
277  
278  
279  
280  
281  
282  
283  
284  
285  
286  
287  
288  
289  
290  
291  
292  
293  
294  
295  
296  
297  
298  
299  
300  
301  
302  
303  
304  
305  
306  
307  
308  
309  
310  
311  
312  
313  
314  
315  
316  
317  
318  
319  
320  
321  
322  
323  
324  
325  
326  
327  
328  
329  
330  
331  
332  
333  
334  
335  
336  
337  
338  
339  
340  
341  
342  
343  
344  
345  
346  
347  
348  
349  
350  
351  
352  
353  
354  
355  
356  
357  
358  
359  
360  
361  
362  
363  
364  
365  
366  
367  
368  
369  
370  
371  
372  
373  
374  
375  
376  
377  
378  
379  
380  
381  
382  
383  
384  
385  
386  
387  
388  
389  
390  
391  
392  
393  
394  
395  
396  
397  
398  
399  
400  
401  
402  
403  
404  
405  
406  
407  
408  
409  
410  
411  
412  
413  
414  
415  
416  
417  
418  
419  
420  
421  
422  
423  
424  
425  
426  
427  
428  
429  
430  
431  
432  
433  
434  
435  
436  
437  
438  
439  
440  
441  
442  
443  
444  
445  
446  
447  
448  
449  
450  
451  
452  
453  
454  
455  
456  
457  
458  
459  
460  
461  
462  
463  
464  
465  
466  
467  
468  
469  
470  
471  
472  
473  
474  
475  
476  
477  
478  
479  
480  
481  
482  
483  
484  
485  
486  
487  
488  
489  
490  
491  
492  
493  
494  
495  
496  
497  
498  
499  
500  
501  
502  
503  
504  
505  
506  
507  
508  
509  
510  
511  
512  
513  
514  
515  
516  
517  
518  
519  
520  
521  
522  
523  
524  
525  
526  
527  
528  
529  
530  
531  
532  
533  
534  
535  
536  
537  
538  
539  
540  
541  
542  
543  
544  
545  
546  
547  
548  
549  
550  
551  
552  
553  
554  
555  
556  
557  
558  
559  
560  
561  
562  
563  
564  
565  
566  
567  
568  
569  
570  
571  
572  
573  
574  
575  
576  
577  
578  
579  
580  
581  
582  
583  
584  
585  
586  
587  
588  
589  
590  
591  
592  
593  
594  
595  
596  
597  
598  
599  
600  
601  
602  
603  
604  
605  
606  
607  
608  
609  
610  
611  
612  
613  
614  
615  
616  
617  
618  
619  
620  
621  
622  
623  
624  
625  
626  
627  
628  
629  
630  
631  
632  
633  
634  
635  
636  
637  
638  
639  
640  
641  
642  
643  
644  
645  
646  
647  
648  
649  
650  
651  
652  
653  
654  
655  
656  
657  
658  
659  
660  
661  
662  
663  
664  
665  
666  
667  
668  
669  
670  
671  
672  
673  
674  
675  
676  
677  
678  
679  
680  
681  
682  
683  
684  
685  
686  
687  
688  
689  
690  
691  
692  
693  
694  
695  
696  
697  
698  
699  
700  
701  
702  
703  
704  
705  
706  
707  
708  
709  
710  
711  
712  
713  
714  
715  
716  
717  
718  
719  
720  
721  
722  
723  
724  
725  
726  
727  
728  
729  
730  
731  
732  
733  
734  
735  
736  
737  
738  
739  
740  
741  
742  
743  
744  
745  
746  
747  
748  
749  
750  
751  
752  
753  
754  
755  
756  
757  
758  
759  
760  
761  
762  
763  
764  
765  
766  
767  
768  
769  
770  
771  
772  
773  
774  
775  
776  
777  
778  
779  
780  
781  
782  
783  
784  
785  
786  
787  
788  
789  
790  
791  
792  
793  
794  
795  
796  
797  
798  
799  
800  
801  
802  
803  
804  
805  
806  
807  
808  
809  
810  
811  
812  
813  
814  
815  
816  
817  
818  
819  
820  
821  
822  
823  
824  
825  
826  
827  
828  
829  
830  
831  
832  
833  
834  
835  
836  
837  
838  
839  
840  
841  
842  
843  
844  
845  
846  
847  
848  
849  
850  
851  
852  
853  
854  
855  
856  
857  
858  
859  
860  
861  
862  
863  
864  
865  
866  
867  
868  
869  
870  
871  
872  
873  
874  
875  
876  
877  
878  
879  
880  
881  
882  
883  
884  
885  
886  
887  
888  
889  
890  
891  
892  
893  
894  
895  
896  
897  
898  
899  
900  
901  
902  
903  
904  
905  
906  
907  
908  
909  
910  
911  
912  
913  
914  
915  
916  
917  
918  
919  
920  
921  
922  
923  
924  
925  
926  
927  
928  
929  
930  
931  
932  
933  
934  
935  
936  
937  
938  
939  
940  
941  
942  
943  
944  
945  
946  
947  
948  
949  
950  
951  
952  
953  
954  
955  
956  
957  
958  
959  
960  
961  
962  
963  
964  
965  
966  
967  
968  
969  
970  
971  
972  
973  
974  
975  
976  
977  
978  
979  
980  
981  
982  
983  
984  
985  
986  
987  
988  
989  
990  
991  
992  
993  
994  
995  
996  
997  
998  
999  
1000

11 **Figure 3. Cytoplasmic nuclear incompatibility is widespread within *C. nouraguensis*. (A)**

L2 To determine whether a particular cytoplasmic-nuclear combination is incompatible, we tested for  
L3 statistical differences in viability between the F1 female backcross that combines heterotypic  
L4 cytoplasmic and nuclear genotypes (top cross) and the backcross that combines homotypic  
L5 cytoplasmic and nuclear genotypes (bottom cross, see Materials and Methods). We also calculated  
L6 the relative viability of the first cross to the second. **(B)** A scatter plot depicting all the cytoplasmic-  
L7 nuclear compatibility tests performed. Each point corresponds to a single replicate of a certain  
L8 cytoplasmic-nuclear combination. Points above the horizontal dashed gray line indicate statistically  
L9 significant differences in viability between the two types of crosses mentioned in (A) ( $P < 0.0006$  after  
L10 Bonferroni correction, Fisher's exact test). Points above the horizontal dashed gray line that have a  
L11 relative viability  $< 1$  are considered statistically significant cytoplasmic-nuclear incompatibilities. The  
L12 color of a point corresponds to the cytoplasmic genotype being tested. All cytoplasmic genotypes  
L13 tested show an incompatibility with one or more heterotypic nuclear genotypes. See Figure S4 for  
L14 separate graphs of all combinations. Above the scatterplot are boxplots depicting the relative  
L15 viabilities of statistically significant cytoplasmic-nuclear incompatibilities. The color corresponds to  
L16 cytoplasmic genotype tested. Incompatibilities involving the NIC59 cytoplasmic genotype have  
L17 reduced viability compared to those involving the JU1837 and JU1854 cytoplasmic genotypes  
L18 ( $P < 0.001$ , Kruskal-Wallis test followed by Dunn's test). **(C)** A heatmap depicting the median relative  
L19 viability for each cytoplasmic-nuclear combination. Each cytoplasmic-nuclear combination shows the  
L20 proportion of replicates that exhibit significant incompatibilities (e.g. 3 out of 3 replicates exhibit  
L21 significant incompatibilities for the NIC59 cytoplasm – JU1854 nuclear combination, while only 1 out  
L22 of 3 replicates exhibit significant incompatibilities for the JU1837 cytoplasm – JU1854 nuclear  
L23 combination). Each cytoplasmic genotype is consistently incompatible with at least one heterotypic  
L24 nuclear genotype. The NIC59 cytoplasm has a distinct response to hybridization than the others  
L25 tested.



37 **Figure 4. A single BDM incompatibility between a NIC59 cytoplasmic locus and a JU1825**

38 **nuclear locus causes embryonic lethality. (A)** Approximately 50% of the F2 progeny from (N); N/J  
39 F1 female x JU1825 male crosses arrest during embryogenesis, significantly higher than that seen in  
40 intra-strain crosses ( $P < 0.001$ ). In contrast, (J); N/J F1 female x JU1825 male and parental strain  
41 crosses exhibit low and similar levels of embryonic lethality ( $P > 0.05$ ). **(B)** Initially, fifteen (N); N/J F1  
42 females were independently backcrossed to single JU1825 males. For each independent lineage, a  
43 single surviving F2 female was again backcrossed to a JU1825 male. This backcrossing scheme was  
44 repeated until the F5 generation (11 lineages remain). Each colored line represents a single  
45 backcross lineage. All backcross lineages exhibit ~50% embryonic lethality throughout the backcross  
46 generations, consistent with the hypothesis that an incompatibility between a NIC59 cytoplasmic  
47 locus and a single JU1825 nuclear locus causes embryonic lethality. **(C)** Both parental strains were  
48 “backcrossed” as a negative control (JU1825 = 14 backcross lineages in the F1 generation, 11  
49 lineages by the F4 generation; NIC59 = 15 backcross lineages in the F1 generation, 11 lineages by  
50 the F4 generation). All p-values were calculated by a Kruskal-Wallis test followed by Dunn’s test.

52 **Figure 5. The JU1825 cytoplasm is heteroplasmic for JU1825-like and NIC59-like alleles. (A)**

53 The viability of 15 independent (J); N/J female x NIC59 male backcross lineages were followed until  
54 the F5 generation. Surprisingly, in some lineages, multiple generations of backcrossing resulted in  
55 increased viability (similar to that seen in intra-strain crosses). **(B)** The viability of 15 independent (J);  
56 N/J female x JU1825 male backcross lineages were also followed until the F5 generation.  
57 Interestingly, multiple generations of backcrossing results in some lineages with significantly reduced  
58 viability, similar to that seen in (N); N/J F1 female x JU1825 male crosses. We also examined  
59 embryonic lethality, finding that some lineages exhibit the ~50% embryonic lethality seen in (N); N/J  
60 F1 female x JU1825 male crosses upon additional generations of backcrossing. These results are  
61 consistent with the hypothesis that the JU1825 cytoplasm is heteroplasmic and contains JU1825-like  
62 and NIC59-like alleles.

53

54 **Figure 6. Mitochondrial-nuclear incompatibility model. (A)** We hypothesize that F2 hybrid  
55 breakdown is the result of a Bateson-Dobzhansky-Muller incompatibility between the NIC59  
56 mitochondrial genome and a nuclear locus homozygous for the JU1825 allele, and vice versa. As a  
57 specific example, when NIC59 females are crossed to JU1825 males, the resulting F1 hybrid females  
58 are expected to be heterozygous at all autosomal loci while inheriting only NIC59 mtDNA. When F1  
59 females are backcrossed to JU1825 males, F2 inviability results from an incompatibility between  
60 NIC59 mtDNA and an autosomal locus homozygous for the JU1825 nuclear allele. **(B)** We  
61 hypothesize that the JU1825 cytoplasm is heteroplasmic in F1 females and contains at least one  
62 NIC59-like allele. Backcrossing hybrid females with a JU1825 cytoplasm (i.e. (J); N/J females) to  
63 NIC59 males for multiple generations can allow the NIC59-like cytoplasmic allele to increase in  
64 frequency and dilute out the effects of the incompatible JU1825-like mtDNA (e.g. top right F2 female).  
65 This eventually may allow the NIC59 nuclear locus to become homozygous and restore the viability of  
66 a lineage. On the other hand, the NIC59-like mtDNA can stay at a low frequency in viable F2 females  
67 (e.g. bottom right F2 female). Backcrossing these F2 females to NIC59 males results in levels of  
68 inviability similar to the F2 generation. **(C)** By a similar line of reasoning, backcrossing hybrid females  
69 with a JU1825 cytoplasm to JU1825 males for multiple generations can allow the NIC59-like mtDNA  
70 to increase in frequency, where it can mimic the same genetic incompatibility seen in (N); N/J F1  
71 female x JU1825 male crosses (Figure 6A).

32

33 **Supplemental Figure 1. Variability of (J); N/J F1 female x JU1825 male crosses across**  
34 **experiments.** Three biological replicates of the same type of backcross experiment. (J); N/J F1  
35 female x JU1825 male crosses can either exhibit similar or significantly decreased rates of viability in  
36 comparison to intra-strain crosses across experiments (Experiment 1, non-significant,  $P > 0.05$ ;  
37 Experiment 2, non-significant,  $P > 0.05$ ; Experiment 3,  $P > 0.05$ , non-significant in comparison to  
38 JU1825 x JU1825 crosses,  $P < 0.05$  significant in comparison to NIC59 x NIC59 crosses). However,

(J); N/J F1 female x JU1825 male crosses consistently exhibit significantly increased rates of viability in comparison to (N); N/J F1 female x JU1825 male crosses (Experiment 1, \*\*,  $P < 0.01$ ; Experiment 2, \*\*,  $P < 0.01$ ; Experiment 3, \*,  $P < 0.05$ ). Experiments 1 and 2 are data from Figures 2 and 5, respectively. All p-values were calculated by a Kruskal-Wallis test followed by Dunn's test.

### **Supplemental Figure 2. Nuclear incompatibility loci are linked to autosomes, not sex**

**chromosomes.** F1 intercrosses allow us to infer that the nuclear incompatibility loci are autosomal, not X-linked. From the (N); N/J F1 x JU1825 male backcross experiment (Figure 2), we concluded that F2 inviability was the result of a genetic incompatibility between the NIC59 mitochondrial genome and nuclear loci homozygous or hemizygous for JU1825 alleles. It is reasonable to assume that the same genetic incompatibility contributes to F2 inviability in (N); N/J F1 female x (N); N/J F1 male crosses. If the nuclear incompatibility locus were X-linked, F2 males would have a 50% chance of being hemizygous for the JU1825 nuclear incompatibility locus while F2 females can only be heterozygous or homozygous for NIC59 alleles. Therefore, if the locus were X-linked, half of F2 males would be inviable while females would be unaffected. If the nuclear incompatibility locus were autosomally linked, then both sexes have an equal chance of being homozygous for the JU1825 nuclear incompatibility locus. Therefore, both sexes are expected to suffer equal rates of inviability. We do not observe a significant decrease in the proportion of viable F2 males (Figure 1), so we conclude that the JU1825 nuclear incompatibility locus or loci are linked to autosomes. The same line of reasoning can be used to show that the NIC59 incompatibility locus or loci are also autosomally linked.

### **Supplemental Figure 3. Endosymbiotic bacteria do not cause cytoplasmic-nuclear**

**incompatibility. (A)** PCR on both JU1825 and NIC59 crude lysates (10 adult worms per lysate, 5 females and 5 males) with degenerate primers against the *Wolbachia fbpA* or *gatB* loci fails to amplify the expected products.  $w^{1118}$  (wol+) and  $w^{1118}$  (wol-) *D. melanogaster* flies serve as positive and

15 negative controls, respectively. PCR on crude lysates of OP50 (bacterial food source of NIC59 and  
16 JU1825) also fails to amplify the expected products. PCR on JU2079, an inbred strain derived from  
17 JU1825, also fails to amplify the expected *gatB* product. **(B)** Both tetracycline-treated (J);N/J F1  
18 female x NIC59 male and (N);N/J F1 female x JU1825 male crosses exhibit significantly decreased  
19 levels of viability in comparison to tetracycline treated intra-strain crosses ( $P < 0.01$ ). Additionally, there  
20 are no statistical differences in viability between NIC59 x NIC59 and JU1825 x JU1825 tetracycline  
21 treated intra-strain crosses ( $P > 0.05$ ).  $N = 14$  or  $15$  for each cross. All p-values were calculated by a  
22 Kruskal-Wallis test followed by Dunn's test.

23  
24 **Supplemental Figure 4. Cytoplasmic-nuclear tests separated by nuclear genotype.** Each graph  
25 depicts all the cytoplasmic-nuclear tests performed between four cytoplasmic genotypes and a single  
26 nuclear genotype. This is the same data that is grouped into a single graph in Figure 3B. Each  
27 cytoplasmic-nuclear combination has three biological replicates (except for JU1825 cytoplasm –  
28 NIC24 nuclear and JU1825 cytoplasm – NIC54 nuclear combinations, which have four replicates).  
29 Although there appear to be many cases of significant cytoplasmic-nuclear incompatibility (relative  
30 viability  $< 1$  and  $P < 0.0006$  after Bonferroni correction), there can be discrepancies between replicates  
31 (e.g. one replicate of the JU1825 cytoplasm – NIC24 nuclear combination indicates a significant  
32 incompatibility, while the other three do not).

33

## LITERATURE CITED

- 34
- 35 Aalto E. A., Koelewijn H.-P., Savolainen O., 2013 Cytoplasmic Male Sterility Contributes to Hybrid  
36 Incompatibility Between Subspecies of *Arabidopsis lyrata*. *G3*. 3: 1727–1740.
- 37 Arnqvist G., Dowling D. K., Eady P., Gay L., Tregenza T., Tuda M., Hosken D. J., 2010 Genetic  
38 architecture of metabolic rate: Environment specific epistasis between mitochondrial and nuclear  
39 genes in an insect. *Evolution* (N. Y). 64: 3354–3363.
- 40 Baldo L., Hotopp J. C. D., Jolley K. A., Bordenstein S. R., Biber S. A., Choudhury R. R., Hayashi C.,  
41 Maiden M. C. J., Tettelin H., Werren J. H., 2006 Multilocus sequence typing system for the  
42 endosymbiont *Wolbachia pipientis*. *Appl. Environ. Microbiol.* 72: 7098–7110.
- 43 Barbash D. A., Awadalla P., Tarone A. M., 2004 Functional Divergence Caused by Ancient Positive  
44 Selection of a *Drosophila* Hybrid Incompatibility Locus. *PLoS Biol.* 2: e142.
- 45 Bikard D., Patel D., Mett  C. Le, Giorgi V., Camilleri C., Bennett M. J., Loudet O., 2009 Divergent  
46 evolution of duplicate genes leads to genetic incompatibilities within *A. thaliana*. *Science* 323:  
47 623–626.
- 48 Bordenstein S. R., O’Hara F. P., Werren J. H., 2001 *Wolbachia*-induced incompatibility precedes  
49 other hybrid incompatibilities in *Nasonia*. *Nature* 409: 707–710.
- 50 Bourtzis K., Nirgianaki A., Markakis G., Savakis C., 1996 *Wolbachia* infection and cytoplasmic  
51 incompatibility in *Drosophila* species. *Genetics* 144: 1063–1073.
- 52 Brenner S., 1974 The genetics of *Caenorhabditis elegans*. *Genetics* 77: 71-94.
- 53 Brideau N. J., Flores H. A., Wang J., Maheshwari S., Wang X., Barbash D. A., 2006 Two  
54 Dobzhansky-Muller genes interact to cause hybrid lethality in *Drosophila*. *Science* 314: 1292–  
55 1295.
- 56 Burton R. S., Barreto F. S., 2012 A disproportionate role for mtDNA in Dobzhansky-Muller  
57 incompatibilities? *Mol. Ecol.* 21: 4942–4957.
- 58 Chae E., Bomblies K., Kim S. T., Karelina D., Zaidem M., Ossowski S., Mart n-Pizarro C., Laitinen R.  
59 A. E., Rowan B. A., Tenenboim H., Lechner S., Demar M., Habring-M ller A., Lanz C., R tsch

- 50 G., Weigel D., 2014 Species-wide genetic incompatibility analysis identifies immune genes as hot  
51 spots of deleterious epistasis. *Cell* 159: 1341–1351.
- 52 Chang C.-C., Rodriguez J., Ross J., 2015 Mitochondrial-Nuclear Epistasis Impacts Fitness and  
53 Mitochondrial Physiology of Interpopulation *Caenorhabditis briggsae* Hybrids. *G3*. 6: 209–19.
- 54 Chou J.-Y., Hung Y.-S., Lin K.-H., Lee H.-Y., Leu J.-Y., 2010 Multiple molecular mechanisms cause  
55 reproductive isolation between three yeast species. *PLoS Biol.* 8: e1000432.
- 56 Coyne J. A., Orr H. A., 1998 The evolutionary genetics of speciation. *Philos. Trans. R. Soc. Lond. B.*  
57 *Biol. Sci.* 353: 287–305.
- 58 Coyne J.A., Orr H.A., 2004 *Speciation*, Sinauer Associates, Sunderland MA.
- 59 Darby A. C., Gill A. C., Armstrong S. D., Hartley C. S., Xia D., Wastling J. M., Makepeace B. L., 2015  
60 Integrated transcriptomic and proteomic analysis of *Wolbachia* to doxycycline-induced stress.  
61 *Mol. Cell. Proteomics* 14: 1038–53.
- 62 Davies B., Hatton E., Altemose N., Hussin J. G., Pratto F., Zhang G., Hinch A. G., Moralli D., Biggs  
63 D., Diaz R., Preece C., Li R., Bitoun E., Brick K., Green C.M., Camerini-Otero R.D., Myers S. R.,  
64 Donnelly P., 2016 Re-engineering the zinc fingers of PRDM9 reverses hybrid sterility in mice.  
65 *Nature* 530: 171–176.
- 66 Delph L. F., Demuth J. P., 2016 Haldane's rule: Genetic bases and their empirical support. *J. Hered.*  
67 107: 383–391.
- 68 Ellison C. K., Burton R. S., 2008 Interpopulation hybrid breakdown maps to the mitochondrial  
69 genome. *Evolution (N. Y.)*. 62: 631–638.
- 70 Ellison C. K., Niehuis O., Gadau J., 2008 Hybrid breakdown and mitochondrial dysfunction in hybrids  
71 of *Nasonia* parasitoid wasps. *J. Evol. Biol.* 21: 1844–1851.
- 72 Félix M. A., Braendle C., Cutter A. D., 2014 A streamlined system for species diagnosis in  
73 *caenorhabditis* (Nematoda: Rhabditidae) with name designations for 15 distinct biological  
74 species. *PLoS One*. 9: e94723.
- 75 Ferree P. M., Barbash D. A., 2009 Species-specific heterochromatin prevents mitotic chromosome

36 segregation to cause hybrid lethality in *Drosophila*. *PLoS Biol.* 7: e1000234.

37 Fischer G., James S. A., Roberts I. N., Oliver S. G., Louis E. J., 2000 Chromosomal evolution in  
38 *Saccharomyces*. *Nature* 405: 451–454.

39 Fujii S., Bond C. S., Small I. D., 2011 Selection patterns on restorer-like genes reveal a conflict  
40 between nuclear and mitochondrial genomes throughout angiosperm evolution. *Proc. Natl. Acad.*  
41 *Sci. U. S. A.* 108: 1723–1728.

42 Gemmell N. J., Metcalf V. J., Allendorf F. W., 2004 Mother's curse: The effect of mtDNA on individual  
43 fitness and population viability. *Trends Ecol. Evol.* 19: 238–244.

44 Gustafsson C. M., Falkenberg M., Larsson N.-G., 2016 Maintenance and Expression of Mammalian  
45 Mitochondrial DNA. *Annu. Rev. Biochem.* 85: 9.1-9.28

46 Hicks K. A., Howe D. K., Leung A., Denver D. R., Estes S., 2012 In Vivo Quantification Reveals  
47 Extensive Natural Variation in Mitochondrial Form and Function in *Caenorhabditis briggsae*.  
48 *PLoS One* 7: e43837.

49 Huang W., Yu C., Hu J., Wang L., Dan Z., Zhou W., He C., Zeng Y., Yao G., Qi J., Zhang Z., Zhu R.,  
50 Chen X., Zhu Y., 2015 Pentatricopeptide-repeat family protein RF6 functions with hexokinase 6  
51 to rescue rice cytoplasmic male sterility. *Proc. Natl. Acad. Sci. U. S. A.* 112: 14984–9.

52 Hunter N., Chambers S. R., Louis E. J., Borts R. H., 1996 The mismatch repair system contributes to  
53 meiotic sterility in an interspecific yeast hybrid. *TL - 15. EMBO J.* 15 VN-r: 1726–1733.

54 Kiontke K. C., Félix M.-A., Ailion M., Rockman M. V., Braendle C., Pénigault J.-B., Fitch D. H., 2011 A  
55 phylogeny and molecular barcodes for *Caenorhabditis*, with numerous new species from rotting  
56 fruits. *BMC Evol. Biol.* 11: 339.

57 Lee H. Y., Chou J. Y., Cheong L., Chang N. H., Yang S. Y., Leu J. Y., 2008 Incompatibility of Nuclear  
58 and Mitochondrial Genomes Causes Hybrid Sterility between Two Yeast Species. *Cell* 135:  
59 1065–1073.

60 Luo D., Xu H., Liu Z., Guo J., Li H., Chen L., Fang C., Zhang Q., Bai M., Yao N., Wu H., Wu H., Ji C.,  
61 Zheng H., Chen Y., Ye S., Li X., Zhao X., Li R., Liu Y.-G., 2013 A detrimental mitochondrial-

L2 nuclear interaction causes cytoplasmic male sterility in rice. *Nat. Genet.* 45: 573–577.

L3 Ma H., Gutierrez N. M., Morey R., Dyken C. Van, Kang E., Hayama T., Lee Y., Li Y., Tippner-Hedges  
L4 R., Wolf D. P., Laurent L. C., Mitalipov S., 2016 Incompatibility between Nuclear and  
L5 Mitochondrial Genomes Contributes to an Interspecies Reproductive Barrier Article  
L6 Incompatibility between Nuclear and Mitochondrial Genomes Contributes to an Interspecies  
L7 Reproductive Barrier. *Cell Metab.* 24: 283-294.

L8 Masly J. P., Jones C. D., Noor M. A. F., Locke J., Orr H. A., 2006 Gene transposition as a cause of  
L9 hybrid sterility in *Drosophila*. *Science* 313: 1448–1450.

L10 Mayr E., 1942 *Systematics and the Origin of Species*, Columbia University Press, New York.

L11 McOrist S., 2000 Obligate intracellular bacteria and antibiotic resistance. *Trends Microbiol.* 8: 483–  
L12 486.

L13 Meiklejohn C. D., Holmbeck M. A., Siddiq M. A., Abt D. N., Rand D. M., Montooth K. L., 2013 An  
L14 Incompatibility between a Mitochondrial tRNA and Its Nuclear-Encoded tRNA Synthetase  
L15 Compromises Development and Fitness in *Drosophila*. *PLoS Genet.* 9: e1003238.

L16 Mihola O., Trachtulec Z., Vlcek C., Schimenti J. C., Forejt J., 2009 A Mouse Speciation Gene  
L17 Encodes a Meiotic Histone H3 Methyltransferase. *Science.* 323: 373–5.

L18 Oliveira D. C. S. G., Raychoudhury R., Lavrov D. V., Werren J. H., 2008 Rapidly evolving  
L19 mitochondrial genome and directional selection in mitochondrial genes in the parasitic wasp  
L20 *Nasonia* (Hymenoptera: Pteromalidae). *Mol. Biol. Evol.* 25: 2167–2180.

L21 Oliver P. L., Goodstadt L., Bayes J. J., Birtle Z., Roach K. C., Phadnis N., Beatson S. A., Lunter G.,  
L22 Malik H. S., Ponting C. P., 2009 Accelerated evolution of the *Prdm9* speciation gene across  
L23 diverse metazoan taxa. *PLoS Genet.* 5: e1000753.

L24 Orr H. A., 1995 The population genetics of speciation: The evolution of hybrid incompatibilities.  
L25 *Genetics* 139: 1805–1813.

L26 Osada N., Akashi H., 2012 Mitochondrial-nuclear interactions and accelerated compensatory  
L27 evolution: Evidence from the primate cytochrome c oxidase complex. *Mol. Biol. Evol.* 29: 337–



38 346.

- 39 Phadnis N., Orr H. A., 2009 A single gene causes both male sterility and segregation distortion in  
40 *Drosophila* hybrids. *Science*. 323: 376–379.
- 41 Phadnis N., Baker E. P., Cooper J. C., Frizzell K. A., Hsieh E., la Cruz A. F. A. de, Shendure J.,  
42 Kitzman J. O., Malik H. S., 2015 An essential cell cycle regulation gene causes hybrid inviability  
43 in *Drosophila*. *Science* 350: 1552–5.
- 44 Pires-daSilva A., 2007 Evolution of the control of sexual identity in nematodes. *Semin. Cell Dev. Biol.*  
45 18: 362–370.
- 46 Presgraves D. C., Balagopalan L., Abmayr S. M., Orr H. A., 2003 Adaptive evolution drives  
47 divergence of a hybrid inviability gene between two species of *Drosophila*. *Nature* 423: 715–719.
- 48 Presgraves D. C., 2010 The molecular evolutionary basis of species formation. *Nat. Rev. Genet.* 11:  
49 175–180.
- 50 Rand D. M., Haney R. A., Fry A. J., 2004 Cytonuclear coevolution: The genomics of cooperation.  
51 *Trends Ecol. Evol.* 19: 645–653.
- 52 Ross J. A., Koboldt D. C., Staisch J. E., Chamberlin H. M., Gupta B. P., Miller R. D., Baird S. E.,  
53 Haag E. S., 2011 *Caenorhabditis briggsae* recombinant inbred line genotypes reveal inter-strain  
54 incompatibility and the evolution of recombination. *PLoS Genet.* 7: e1002174.
- 55 Sambatti J. B. M., Ortiz-Barrientos D., Baack E. J., Rieseberg L. H., 2008 Ecological selection  
56 maintains cytonuclear incompatibilities in hybridizing sunflowers. *Ecol. Lett.* 11: 1082–1091.
- 57 Seidel H. S., Ailion M., Li J., Oudenaarden A. van, Rockman M. V., Kruglyak L., 2011 A novel sperm-  
58 delivered toxin causes late-stage embryo lethality and transmission ratio distortion in *C. elegans*.  
59 *PLoS Biol.* 9: e1001115.
- 60 Stelkens R. B., Schmid C., Seehausen O., 2015 Hybrid breakdown in cichlid fish. *PLoS One* 10:  
61 e0127207.
- 62 Tao Y., Hartl D. L., Laurie C. C., 2001 Sex-ratio segregation distortion associated with reproductive  
63 isolation in *Drosophila*. *Proc. Natl. Acad. Sci. U. S. A.* 98: 13183–8.

54 Ting C., Tsaur S.-C., Wu M.-L., Wu C.-I., 1998 A Rapidly Evolving Homeobox at the Site of a Hybrid

55 Sterility Gene. *Science*. 282: 1501–1504.

56 Wallace D. C., Chalkia D., 2013 Mitochondrial DNA genetics and the heteroplasmy conundrum in

57 evolution and disease. *Cold Spring Harb. Perspect. Biol.* 5: a021220.

58 Werren J. H., Baldo L., Clark M. E., 2008 Wolbachia: master manipulators of invertebrate biology.

59 *Nat. Rev Microbiol* 6: 741–751.

70

♀ x ♂

CROSS

JU1825 x JU1825  
 NIC59 x NIC59  
 JU1825 x NIC59  
 NIC59 x JU1825  
 (J);N/J F1 x (J);N/J F1  
 (N);N/J F1 x (N);N/J F1

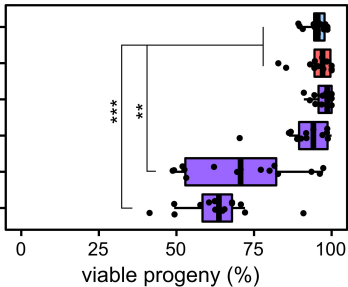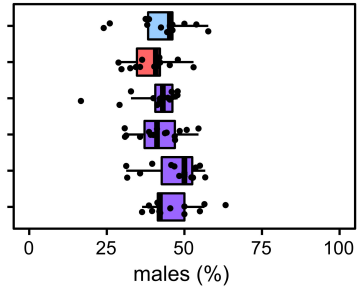

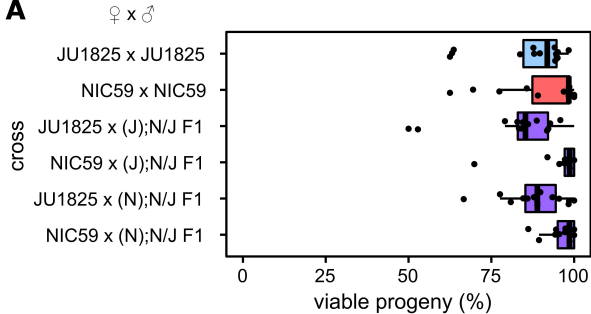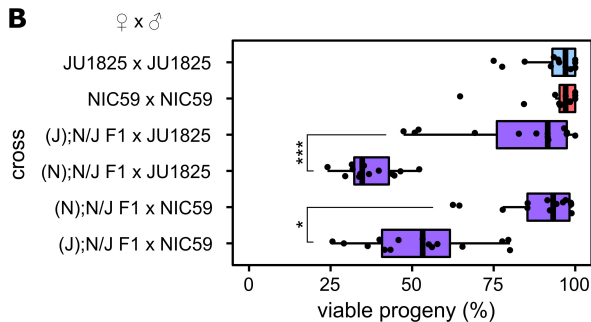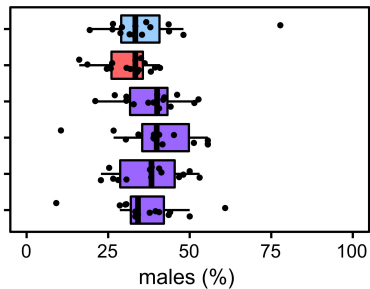

**A**

% viable F2

(NIC59); NIC59/JU1837 F1 ♀ x JU1837 ♂ → 41

(JU1837); NIC59/JU1837 F1 ♀ x JU1837 ♂ → 99

$41 / 99 = 0.41 =$  NIC59 cyto-JU1837 nuc  
relative viability

**B**

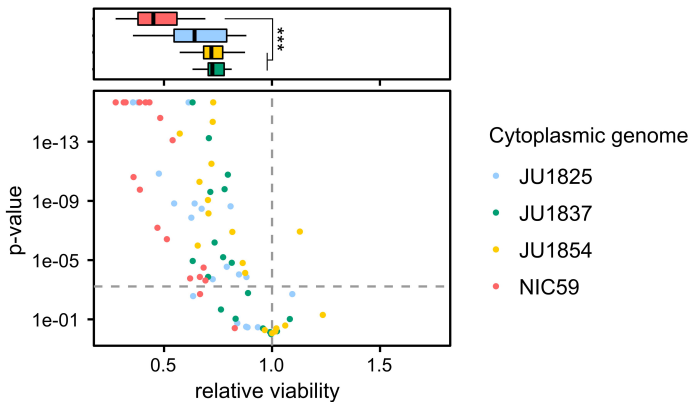

**C**

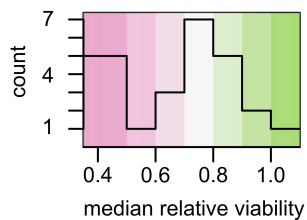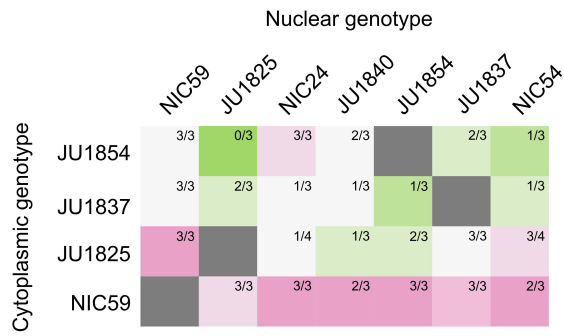

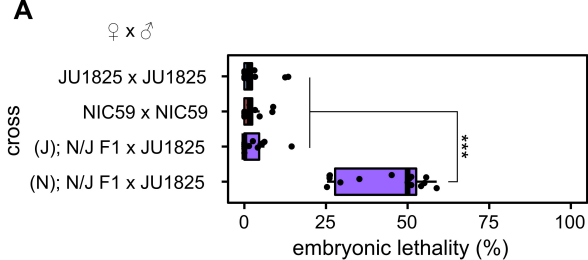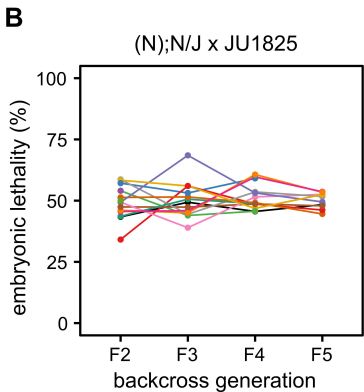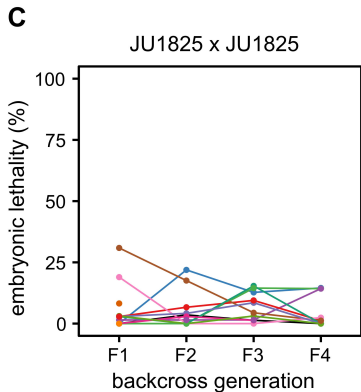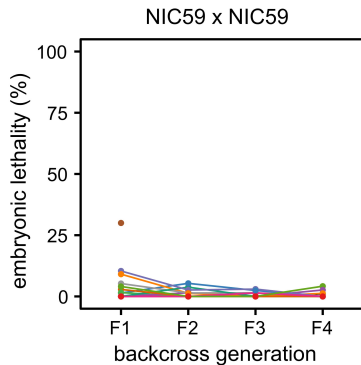

**A****(J);N/J x NIC59**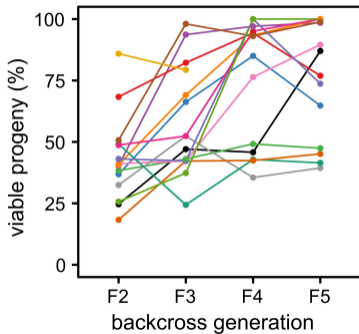**B****(J);N/J x JU1825**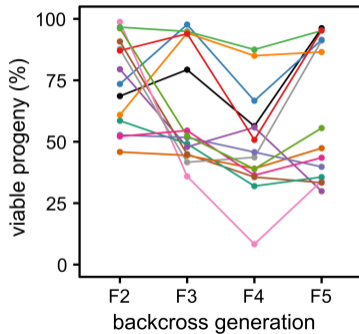**(J);N/J x JU1825**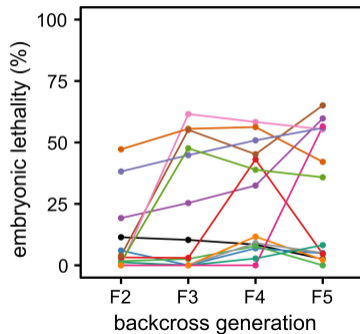

**A**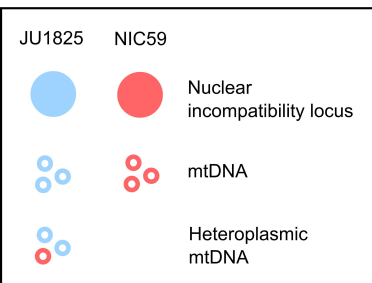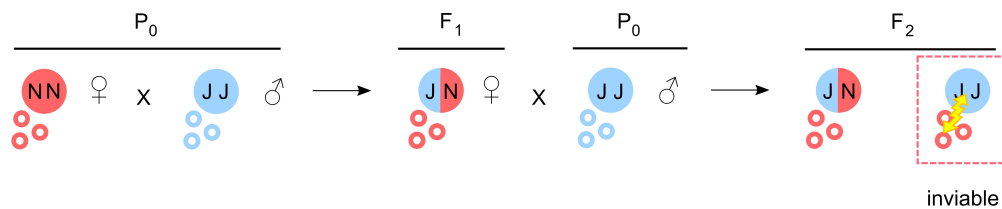**B**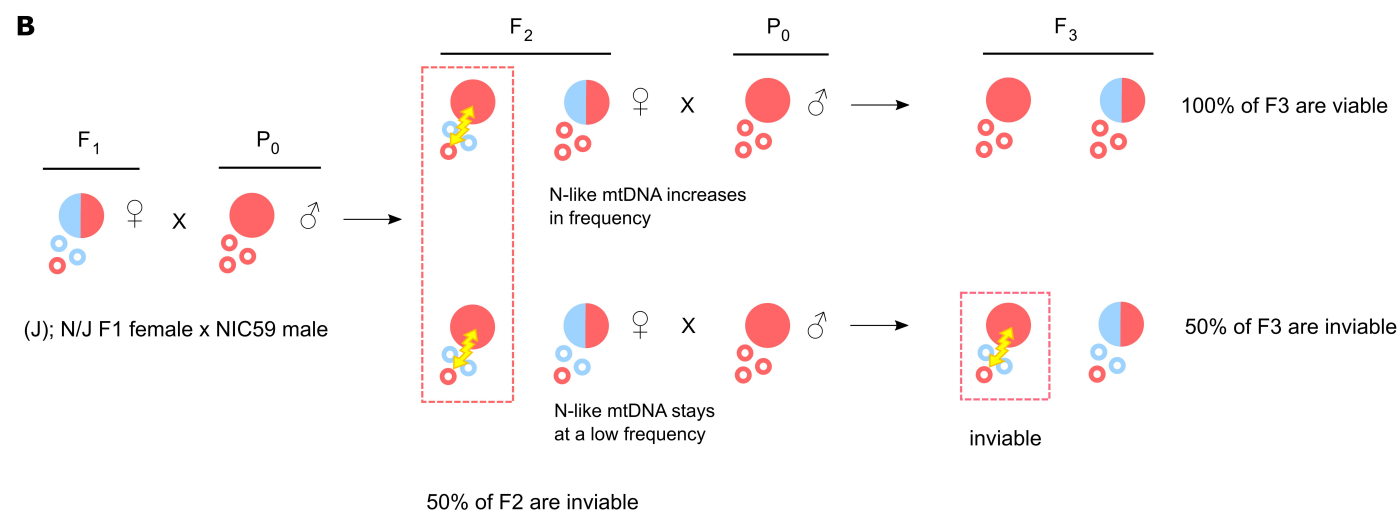**C**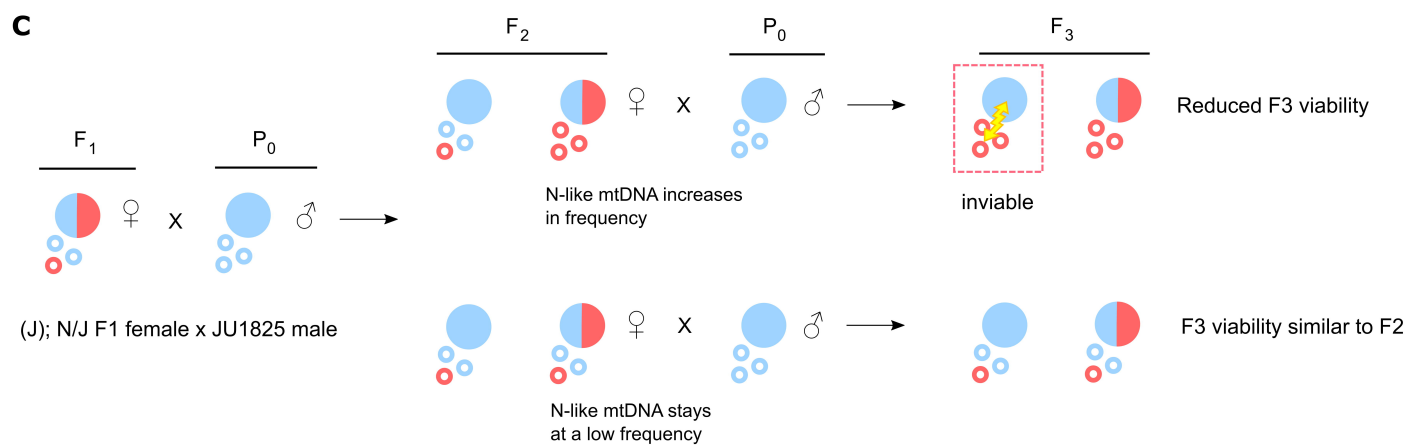

Viable F2
